# Supplementary material
Source: MDPI journal article supplement (https://www.mdpi.com/2073-4344/8/12/593)
Supplement: s1 [file s1]

# Supporting information

## The Role of Impregnated Sodium Ions in Cu/SSZ-13 NH<sub>3</sub>-SCR Catalysts

Chen Wang <sup>1</sup>, Jun Wang <sup>2</sup>, Jianqiang Wang <sup>2</sup>, Zhixin Wang <sup>2</sup>, Zexiang Chen <sup>2</sup>, Xiaolan Li <sup>1</sup>,  
Meiqing Shen <sup>2,\*</sup>, Wenjun Yan <sup>3</sup> and Xue Kang <sup>4,\*</sup>

<sup>1</sup> School of Environment and safety Engineering, North University of China, Taiyuan 030051, China; chenwang87@nuc.edu.cn (C.W.); lxldmu@163.com (X.L.)

<sup>2</sup> Key Laboratory for Green Chemical Technology of State Education Ministry, School of Chemical Engineering & Technology, Tianjin University, Tianjin 300072, China; wangjun@tju.edu.cn (J.W.); jianqiangwang@tju.edu.cn (J.W.); wangzhixin@tju.edu.cn (Z.W.); tjuczx@tju.edu.cn (Z.C.)

<sup>3</sup> Analytical Instrumentation Center, Institute of Coal Chemistry, Chinese Academy of Sciences, Taiyuan 030001, China; yanwenjun@sxicc.ac.cn

<sup>4</sup> School of Chemical Engineering and Technology, North University of China, Taiyuan 030051, China

\* Correspondence: mqshen@tju.edu.cn (M.S.); kx19871111@tju.edu.cn (X.K.); Tel.: +86-155-3689-0402 (X.K.)

## 1. DRIFTS upon NH<sub>3</sub> desorption at different temperatures over fresh Cu/SSZ-13

Diffuse reflectance infrared Fourier transform spectra (DRIFTS) were measured on a Nicolet 6700 spectrometer. The pretreatment at 250 °C for 1 h was executed to remove the adsorbed water and clean the surface before the measurement. NH<sub>3</sub> chemisorption was operated at 100 °C in 500 ppm NH<sub>3</sub>/N<sub>2</sub> (50 mL/min). After being saturated with NH<sub>3</sub>, the flow was switched to N<sub>2</sub>, and the sample was heated up to 600 °C at a rate of 10 °C /min in the N<sub>2</sub> flow. The DRIFTS results of F-Cu are shown in Figure S1.

For fresh Cu/SSZ-13 catalysts, the negative band at  $\approx 896$  and  $954\text{ cm}^{-1}$  was assigned to Cu<sup>2+</sup> in 6MR and [Cu(OH)]<sup>+</sup> in 8MR, respectively. When the adsorption temperature increased from 100 to 400 °C, the bands at 896 and  $954\text{ cm}^{-1}$  gradually weakened and did not change at last, which revealed that no NH<sub>3</sub> desorbed from Cu/SSZ-13 when the temperature was higher than 400 °C. This process corresponded to the release of NH<sub>3</sub> in the peak (A) of the NH<sub>3</sub>-TPD profiles (Figure 2a in the manuscript).

The bands at 3604 and  $3576\text{ cm}^{-1}$  were assigned to NH<sub>3</sub> adsorbed on Brönsted acid sites. The bands at 3604 and  $3576\text{ cm}^{-1}$  were obvious when temperature was 400 °C. With further increasing temperature, the bridged OH groups generally came out. This again confirmed that the peak (B) in the NH<sub>3</sub>-TPD process (Figure. 2a in the manuscript) was assigned to ammonia adsorbed at Brönsted acid sites.

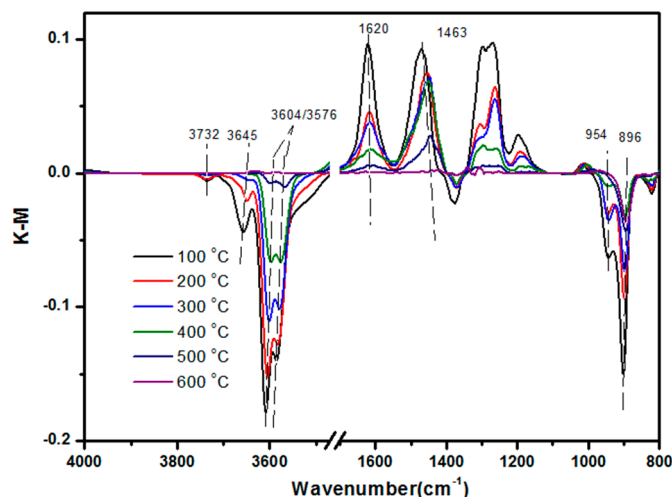

Figure S1. DRIFTS spectra of NH<sub>3</sub>-TPD over Cu/SSZ-13 catalysts.

## 2. XRD results

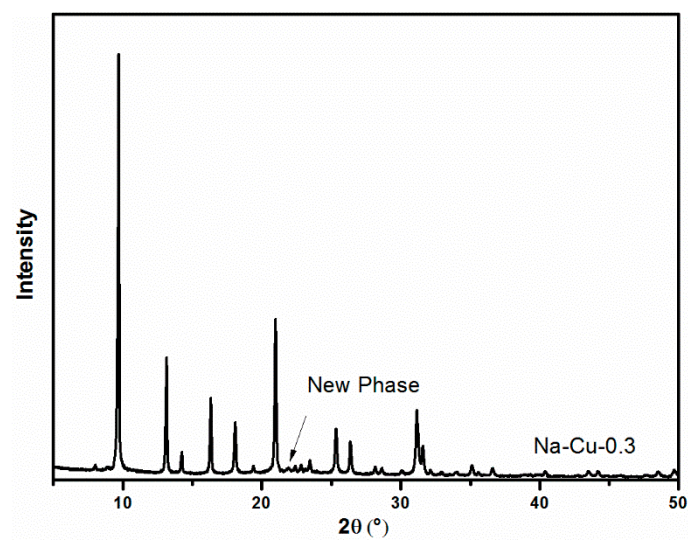

**Figure S2.** XRD results of Na-Cu-0.3 after hydrothermal aging at 750 °C for 16 h.
